# Supplementary material for: Membrane Interaction Characteristics of the RTX Toxins and the Cholesterol-Dependence of Their Cytolytic/Cytotoxic Activity
Source: MDPI journal article supplement (doi:10.3390/ijms25063131), 2024-03-08
Supplement: s1 [file s1]

CyaA 353 AGKSLFDDGLGAAPGVPSCRSKFSPDVLTPVSP...GLRRPSLGAVERQ  
LtxA 103 ERGLTLFAPELDKWIQGNK...HLSNSVGS.TGNLTAKIDKQVSV  
PaxA 114 ERGLTLFAPELDKFIQHS...KISNVVGSSTGDTVNNKLAQSQAI  
ApXIIIA 114 ERGLTLFAPELDKFIQHS...KISNVVGSSTGDAVSKLAKSQTII  
ApXIA 101 ERGLTLFAPELDKFIQHS...KISNVVGSSTGDAVSKLAKSQTII  
EhxA 90 ERGLTLFAPELDKFIQHS...KISNVVGSSTGDAVSKLAKSQTII  
MmxA 104 ERGLTLFAPELDKFIQHS...KISNVVGSSTGDAVSKLAKSQTII  
HlyA 104 ERGLTLFAPELDKFIQHS...KISNVVGSSTGDAVSKLAKSQTII  
MbxA 81 ERGLTLFAPELDKFIQHS...KISNVVGSSTGDAVSKLAKSQTII  
RtxA 102 ERGLTLFAPELDKFIQHS...KISNVVGSSTGDAVSKLAKSQTII  
ApXIIA 105 ERGLTLFAPELDKFIQHS...KISNVVGSSTGDAVSKLAKSQTII  
LkTA 102 ERGLTLFAPELDKFIQHS...KISNVVGSSTGDAVSKLAKSQTII  
PILkTA 102 ERGLTLFAPELDKFIQHS...KISNVVGSSTGDAVSKLAKSQTII

CyaA 401 DSGYDSLDGVGSRFSLGEVSDMAAVEAAELEMTRQVLHAGARQDDAEFGVSGASAHWQG  
LtxA 144 LGTLQAFINTAFSGMDLDA...LTKARQ...NG...KNVTDDVQLAKA...  
PaxA 156 ISGVQSVLGSVLGINLNE...AISG...GSELELAKA...  
ApXIIIA 156 ISGVQSVLGSVLGINLNE...AISG...GSELELAKA...  
ApXIA 143 LSLAQSLFGTALAGMDLDS...LLRRRR...NG...EDVSGSELAKA...  
EhxA 132 LSLAQSLFGTALAGMDLDS...LLRRRR...NG...EDVSGSELAKA...  
MmxA 146 LSLAQSLFGTALAGMDLDS...LLRRRR...NG...EDVSGSELAKA...  
HlyA 146 LSLAQSLFGTALAGMDLDS...LLRRRR...NG...EDVSGSELAKA...  
MbxA 124 LSLAQSLFGTALAGMDLDS...LLRRRR...NG...EDVSGSELAKA...  
RtxA 145 LSLAQSLFGTALAGMDLDS...LLRRRR...NG...EDVSGSELAKA...  
ApXIIA 146 LSLAQSLFGTALAGMDLDS...LLRRRR...NG...EDVSGSELAKA...  
LkTA 142 LSLAQSLFGTALAGMDLDS...LLRRRR...NG...EDVSGSELAKA...  
PILkTA 142 LSLAQSLFGTALAGMDLDS...LLRRRR...NG...EDVSGSELAKA...

CyaA 461 RALQGAQAVAAQRVLVHAIALMTQFGRAGSTNTPQEAASLSAAVFGLEASSAVAEIVSG  
LtxA 182 ...SNNLINELIGTISITN...NVDTFESKQINLKLGEALGQV...HFGS  
PaxA 189 ...GVDLASLGVNIAKGT...TIEAFSEQIQNFQKLVQNAK...GLGG  
ApXIIIA 189 ...GVDLASLGVNIAKGT...TIEAFSEQIQNFQKLVQNAK...GLGG  
ApXIA 181 ...GVDLASLGVNIAKGT...TIEAFSEQIQNFQKLVQNAK...GLGG  
EhxA 170 ...GVDLASLGVNIAKGT...TIEAFSEQIQNFQKLVQNAK...GLGG  
MmxA 184 ...GVDLASLGVNIAKGT...TIEAFSEQIQNFQKLVQNAK...GLGG  
HlyA 184 ...GVDLASLGVNIAKGT...TIEAFSEQIQNFQKLVQNAK...GLGG  
MbxA 158 ...GVDLASLGVNIAKGT...TIEAFSEQIQNFQKLVQNAK...GLGG  
RtxA 179 ...GVDLASLGVNIAKGT...TIEAFSEQIQNFQKLVQNAK...GLGG  
ApXIIA 180 ...GVDLASLGVNIAKGT...TIEAFSEQIQNFQKLVQNAK...GLGG  
LkTA 175 ...GVDLASLGVNIAKGT...TIEAFSEQIQNFQKLVQNAK...GLGG  
PILkTA 175 ...GVDLASLGVNIAKGT...TIEAFSEQIQNFQKLVQNAK...GLGG

CyaA 521 FFRGSSRM.AGGFGVAGGAMALGGGIAAAGVAGMSLT.DDAPAGQKAAAGATLALQTCG  
LtxA 223 FGDKLKLNLP...KLGNLGKGLGALSGVLSAISAALLANKDADTATKAAAGATLALQTCG  
PaxA 230 VGGQKLQHI.SGSALSKTGLGLDIISLLSGVTASFTLADKNASTSTKVAAGFELSNQVIGG  
ApXIIIA 230 VGGQKLQHI.SGSALSKTGLGLDIISLLSGVTASFTLADKNASTSTKVAAGFELSNQVIGG  
ApXIA 221 VGGQKLQHI.SGSALSKTGLGLDIISLLSGVTASFTLADKNASTSTKVAAGFELSNQVIGG  
EhxA 221 VGGQKLQHI.SGSALSKTGLGLDIISLLSGVTASFTLADKNASTSTKVAAGFELSNQVIGG  
MmxA 225 VGGQKLQHI.SGSALSKTGLGLDIISLLSGVTASFTLADKNASTSTKVAAGFELSNQVIGG  
HlyA 224 VGGQKLQHI.SGSALSKTGLGLDIISLLSGVTASFTLADKNASTSTKVAAGFELSNQVIGG  
MbxA 199 VGGQKLQHI.SGSALSKTGLGLDIISLLSGVTASFTLADKNASTSTKVAAGFELSNQVIGG  
RtxA 220 VGGQKLQHI.SGSALSKTGLGLDIISLLSGVTASFTLADKNASTSTKVAAGFELSNQVIGG  
ApXIIA 221 VGGQKLQHI.SGSALSKTGLGLDIISLLSGVTASFTLADKNASTSTKVAAGFELSNQVIGG  
LkTA 216 VGGQKLQHI.SGSALSKTGLGLDIISLLSGVTASFTLADKNASTSTKVAAGFELSNQVIGG  
PILkTA 216 VGGQKLQHI.SGSALSKTGLGLDIISLLSGVTASFTLADKNASTSTKVAAGFELSNQVIGG

CyaA 579 TVELASSIALALAAARGVTSGLQVAGASAGAAAGALAAALSPMEIYGLVQOQSHYADQLDK  
LtxA 281 IGKAITQYLLAQRA...AAGLSTTGPVAGLIAASVVSALSPISFLGIAGKQDRARMLEE  
PaxA 290 ITKAVSSYILAQR...AAGLSTTGPVAGLIAASVVSALSPISFLGIAGKQDRARMLEE  
ApXIIIA 290 ITKAVSSYILAQR...AAGLSTTGPVAGLIAASVVSALSPISFLGIAGKQDRARMLEE  
ApXIA 279 ITKAVSSYILAQR...AAGLSTTGPVAGLIAASVVSALSPISFLGIAGKQDRARMLEE  
EhxA 269 ITKAVSSYILAQR...AAGLSTTGPVAGLIAASVVSALSPISFLGIAGKQDRARMLEE  
MmxA 283 ITKAVSSYILAQR...AAGLSTTGPVAGLIAASVVSALSPISFLGIAGKQDRARMLEE  
HlyA 282 ITKAVSSYILAQR...AAGLSTTGPVAGLIAASVVSALSPISFLGIAGKQDRARMLEE  
MbxA 256 ITKAVSSYILAQR...AAGLSTTGPVAGLIAASVVSALSPISFLGIAGKQDRARMLEE  
RtxA 278 ITKAVSSYILAQR...AAGLSTTGPVAGLIAASVVSALSPISFLGIAGKQDRARMLEE  
ApXIIA 279 ITKAVSSYILAQR...AAGLSTTGPVAGLIAASVVSALSPISFLGIAGKQDRARMLEE  
LkTA 274 ITKAVSSYILAQR...AAGLSTTGPVAGLIAASVVSALSPISFLGIAGKQDRARMLEE  
PILkTA 274 ITKAVSSYILAQR...AAGLSTTGPVAGLIAASVVSALSPISFLGIAGKQDRARMLEE

CyaA 639 LAQESSAYGYECDALLAQYRDKTAEEGAVAGVSAVLSTVGAAVSIAAAASVVGAPVAVV  
LtxA 337 YSKRFKKFGYNGDSLLGQFYANTGIADAAITINTVLSAIAAGVGAASAGSLVGAPIGLL  
PaxA 346 FAERFKKFGYNGDSLLGQFYANTGIADAAITINTVLSAIAAGVGAASAGSLVGAPIGLL  
ApXIIIA 346 FAERFKKFGYNGDSLLGQFYANTGIADAAITINTVLSAIAAGVGAASAGSLVGAPIGLL  
ApXIA 335 YSERFKKFGYNGDSLLGQFYANTGIADAAITINTVLSAIAAGVGAASAGSLVGAPIGLL  
EhxA 325 YSERFKKFGYNGDSLLGQFYANTGIADAAITINTVLSAIAAGVGAASAGSLVGAPIGLL  
MmxA 339 YSERFKKFGYNGDSLLGQFYANTGIADAAITINTVLSAIAAGVGAASAGSLVGAPIGLL  
HlyA 338 YSERFKKFGYNGDSLLGQFYANTGIADAAITINTVLSAIAAGVGAASAGSLVGAPIGLL  
MbxA 312 YSERFKKFGYNGDSLLGQFYANTGIADAAITINTVLSAIAAGVGAASAGSLVGAPIGLL  
RtxA 334 YSERFKKFGYNGDSLLGQFYANTGIADAAITINTVLSAIAAGVGAASAGSLVGAPIGLL  
ApXIIA 335 YSERFKKFGYNGDSLLGQFYANTGIADAAITINTVLSAIAAGVGAASAGSLVGAPIGLL  
LkTA 330 YSERFKKFGYNGDSLLGQFYANTGIADAAITINTVLSAIAAGVGAASAGSLVGAPIGLL  
PILkTA 330 YSERFKKFGYNGDSLLGQFYANTGIADAAITINTVLSAIAAGVGAASAGSLVGAPIGLL

CyaA 699 TSLTGALNGILRGVQPIIEKIANLADYARKIDELGG...PQAYFEKNLQARHEQLANSNDG  
LtxA 397 VSAITSLISGILDASKQAFVEHIANLADYARKIDELGG...PQAYFEKNLQARHEQLANSNDG  
PaxA 406 VTGITGLISGILEFASKQPMLEHVASKLGTKEDEWEKK.YGKNYFENGYDARHAKFALE..D  
ApXIIIA 406 VTGITGLISGILEFASKQPMLEHVASKLGTKEDEWEKK.YGKNYFENGYDARHAKFALE..D  
ApXIA 395 VSAITSLISGILDASKQAFVEHIANLADYARKIDELGG...PQAYFEKNLQARHEQLANSNDG  
EhxA 385 VSAITSLISGILEFASKQPMLEHVASKLGTKEDEWEKK.YGKNYFENGYDARHAKFALE..D  
MmxA 399 VSAITSLISGILEFASKQPMLEHVASKLGTKEDEWEKK.YGKNYFENGYDARHAKFALE..D  
HlyA 398 VSAITSLISGILEFASKQPMLEHVASKLGTKEDEWEKK.YGKNYFENGYDARHAKFALE..D  
MbxA 372 VSAITSLISGILEFASKQPMLEHVASKLGTKEDEWEKK.YGKNYFENGYDARHAKFALE..D  
RtxA 394 VSAITSLISGILEFASKQPMLEHVASKLGTKEDEWEKK.YGKNYFENGYDARHAKFALE..D  
ApXIIA 395 VSAITSLISGILEFASKQPMLEHVASKLGTKEDEWEKK.YGKNYFENGYDARHAKFALE..D  
LkTA 390 VSAITSLISGILEFASKQPMLEHVASKLGTKEDEWEKK.YGKNYFENGYDARHAKFALE..D  
PILkTA 390 VSAITSLISGILEFASKQPMLEHVASKLGTKEDEWEKK.YGKNYFENGYDARHAKFALE..D

**Supplementary Figure S1. Alignment of the pore-forming domain of CyaA against other RTX toxins.** Multiple Sequence Alignment (MSA) was performed with Clustal Omega software and plotted with ESPript 3.0. The name of the toxin and the number of the corresponding residues are shown in the left side. The strictly conserved alanine, arginine, aspartic acid, glutamic acid, glutamine, glycine, isoleucine, leucine, lysine, proline, threonine and tyrosine residues are highlighted with a red frame. CRAC motifs are depicted in purple and CARC motifs in blue.
